# Supplementary material
Source: HighWire-hosted journal article supplement (http://www.cmaj.ca/highwire/filestream/57596/field_highwire_adjunct_files/0/survey.pdf)
Supplement: survey.pdf [file survey.pdf]

## **eCMAJ Survey 2003**

Partial Results as of 4:00 EST, September 29, 2003

**Would you continue to use eCMAJ if access were not free?**

Yes – 9.1 %

No – 55.4 %

Don't Know – 35.5 %
